# Supplementary material
Source: Springer Nature journal article supplement (https://www.springermedizin.de/resource/supplementary/12987_2006_149_MOESM2_ESM.pdf/9611420)

Flow [ml/min]

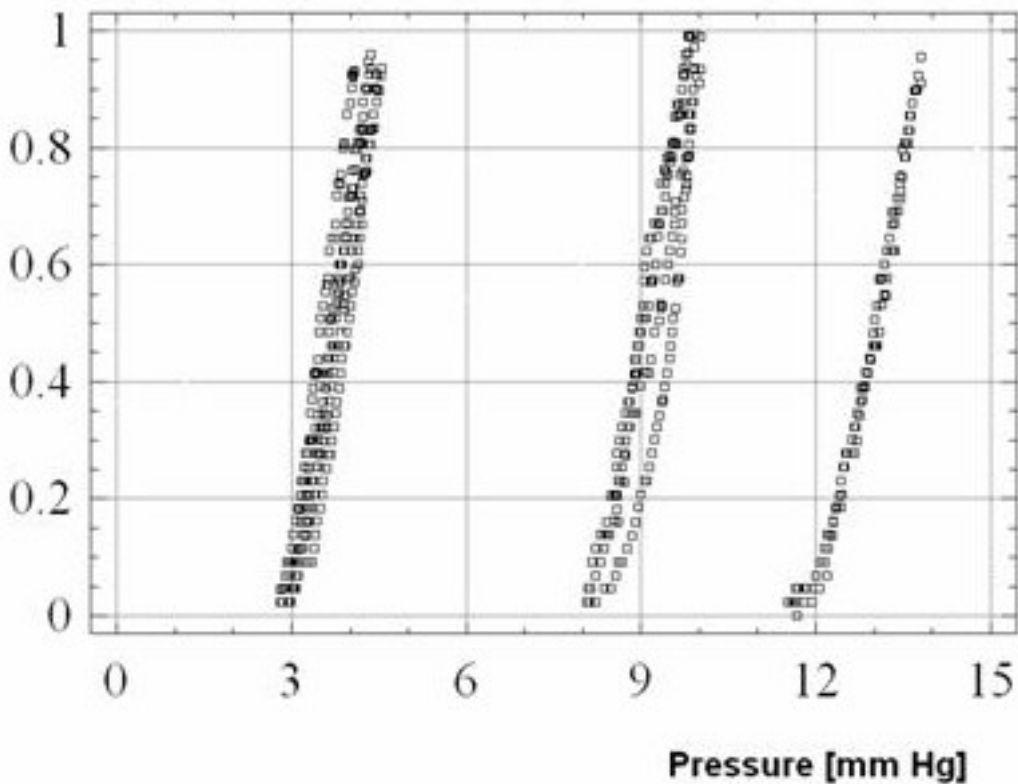

Pressure [mm Hg]

Supplement: MOESM2 [file 9611420]
